# Supplementary material for: Direct Visualization of De novo Lipogenesis in Single Living Cells
Source: PubMed Central journal article supplement (PMC4212242; doi:10.1038/srep06807), 2014-10-29

**Supplementary information**

**Direct Visualization of De-novo Lipogenesis in Single Living Cells**

Junjie Li<sup>1,2</sup>, Ji-Xin Cheng<sup>1,3\*</sup>

<sup>1</sup> Weldon School of Biomedical Engineering, Purdue University, West Lafayette, IN 47907

<sup>2</sup> Department of Biological Sciences, Purdue University, West Lafayette, IN 47907

<sup>3</sup> Center for Cancer Research, Purdue University, West Lafayette, IN 47907

\* Corresponding author: [jcheng@purdue.edu](mailto:jcheng@purdue.edu), 765-494-4335

## **Supplementary figure captions.**

**Movie showing the dynamic motions of newly synthesized lipid droplets in living cells.**

**Supplementary figure 1: Lipogenesis derived from glucose-d<sub>7</sub> or glutamine-d<sub>5</sub> metabolic pathway.** PANC1 cells were treated with 25 mM glucose-d<sub>7</sub> or 4 mM glutamine-d<sub>5</sub> or both in glucose, glutamine-free DMEM media for 3 days. SRS imaging at C-D and C-H vibration were taken.

**Supplementary figure 2: Lipogenesis in pancreatic cancer MIA PaCa2 cells. a.** MIA PaCa2 cells were treated with 25 mM glucose-d<sub>7</sub> in glucose-free DMEM media supplemented without or with 10% FBS for 3 days. SRS imaging at C-D and C-H vibration were taken. The ratio of C-D/C-H was used to analyze the level of de-novo lipogenesis. **b.** Quantitative analysis of de-novo lipogenesis level in MIA PaCa2 cells. The ratio of C-D signal to C-H signal intensity on single LD was measured. Totally 10 lipid droplets were analyzed for each sample. The data was represented by Mean + SD.

**Supplementary figure 3: Lipogenesis and lipid uptake in different cancer cell lines. a.** Glucose-d<sub>7</sub> derived lipogenesis were measured in different cancer cell lines, including breast cancer MCF7, lung cancer A549, prostate cancer PC3 and pancreatic cancer PANC1 by SRS imaging at C-D and C-H vibration. **b.** Quantification of SRS signal at C-D vibration per cell. Data were shown as mean + SD. N= 5 for each group.

C-D

C-H

Glu-d<sub>7</sub>

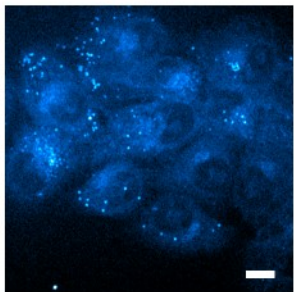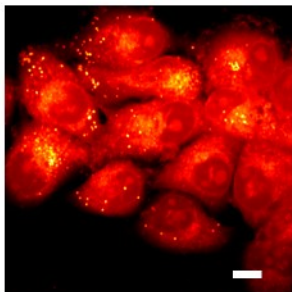

Gln-d<sub>5</sub>

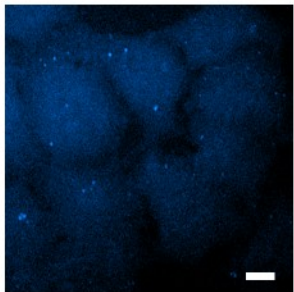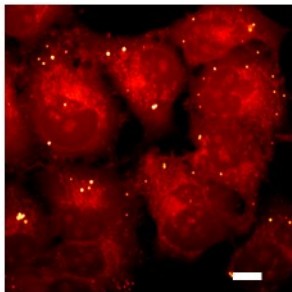

Glu-d<sub>7</sub> + Gln-d<sub>5</sub>

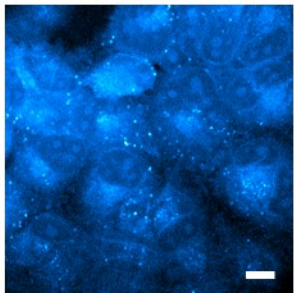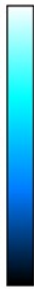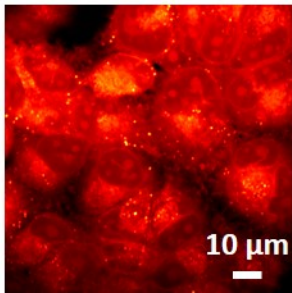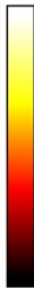

10 μm

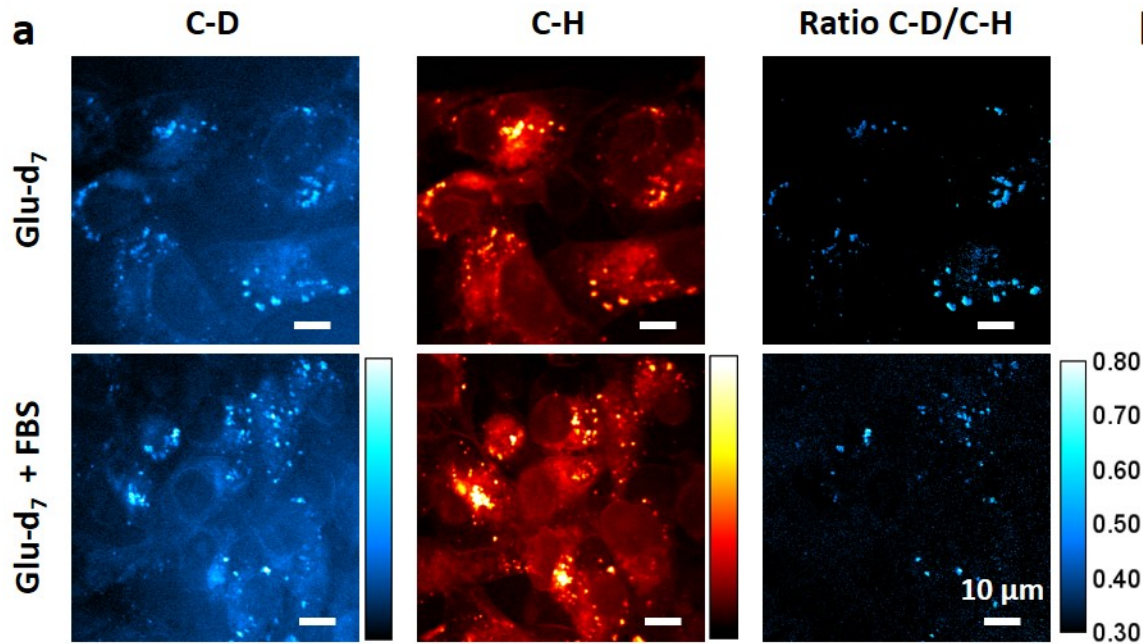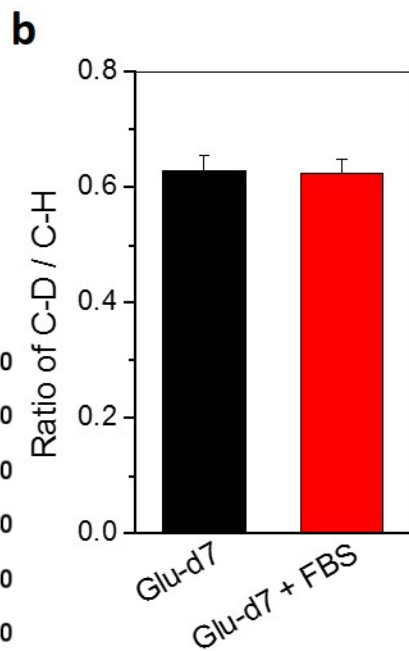

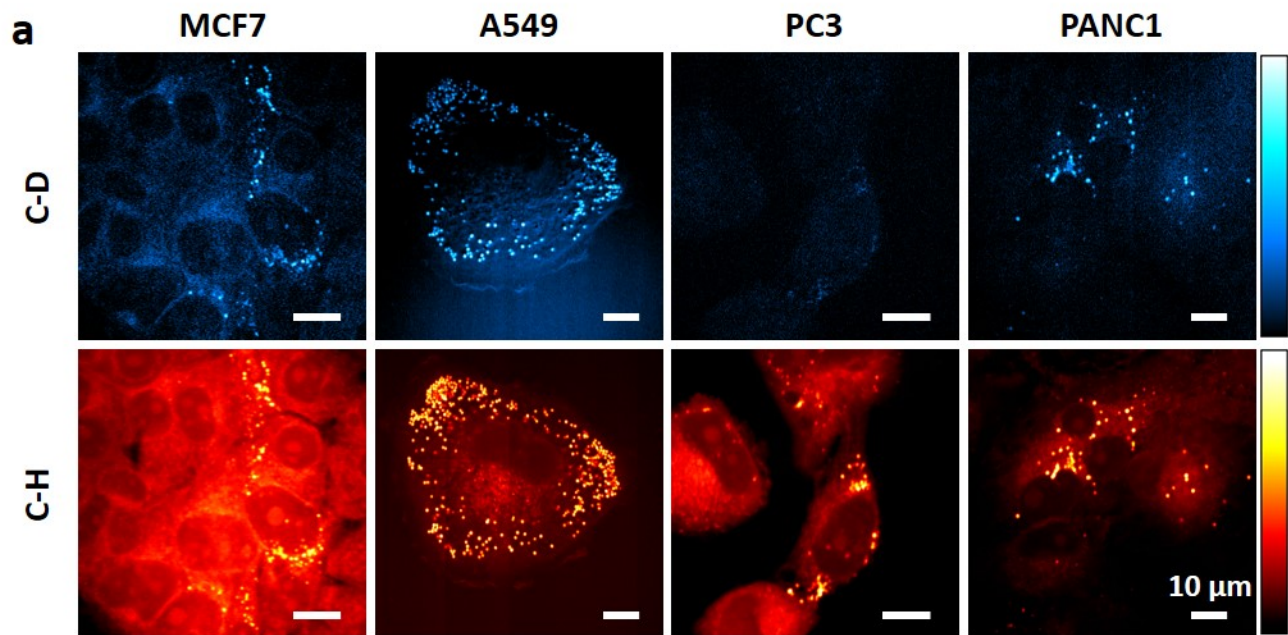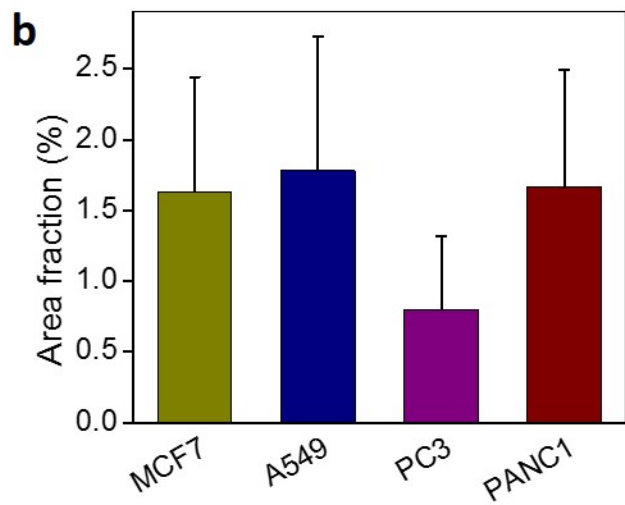

Supplement: srep06807-s1.pdf [file srep06807-s1.pdf]
